# Supplementary material for: Psychometric properties of burnout measures: a systematic review
Source: PubMed Central journal article supplement — Epidemiol Psychiatr Sci. 2021 Jan 13;30:e8. doi: 10.1017/S2045796020001134 (PMC8057391; doi:10.1017/s2045796020001134), 2021-01-13
Supplement: S2045796020001134sup001.pdf [file S2045796020001134sup001.pdf]

**Supplementary material Table S1.** Systematic literature search strategy, exemplified by the search in the MEDLINE and PsycINFO databases

| <b>PROM</b>                                  | <b>Searches</b>                                                                                                                                              | <b>Results</b> |
|----------------------------------------------|--------------------------------------------------------------------------------------------------------------------------------------------------------------|----------------|
| <b>Oldenburg Burnout Inventory (OLBI)</b>    |                                                                                                                                                              |                |
| 1                                            | (Oldenburg Burnout Inventory or OLBI).mp.[mp=ti, ab, tx, ct, ot nm, hw, fx, kf, px, rx, ui, sy, tc, id, tm]                                                  | 303            |
| 2                                            | Validation or validity or reliability or psychometric* or equivalence or invariance).mp. [mp=ti, ab, tx, ct, ot, nm, hw, fx, kf, px, rx, ui, sy, tc, id, tm] | 799727         |
| 3                                            | 1 and 2                                                                                                                                                      | 77             |
| 4                                            | Remove duplicates from 3                                                                                                                                     | 68             |
| <b>Copenhagen Burnout Inventory (CBI)</b>    |                                                                                                                                                              |                |
| 1                                            | (Copenhagen Burnout Inventory or CBI).mp.[mp=ti, ab, tx, ct, ot nm, hw, fx, kf, px, rx, ui, sy, tc, id, tm]                                                  | 1776           |
| 2                                            | Validation or validity or reliability or psychometric* or equivalence or invariance).mp. [mp=ti, ab, tx, ct, ot, nm, hw, fx, kf, px, rx, ui, sy, tc, id, tm] | 799727         |
| 3                                            | 1 and 2                                                                                                                                                      | 251            |
| 4                                            | Remove duplicates from 3                                                                                                                                     | 212            |
| <b>Burnout measure (BM)</b>                  |                                                                                                                                                              |                |
| 1                                            | (Pines Burnout Measure or Pines or BM).mp.[mp=ti, ab, tx, ct, ot nm, hw, fx, kf, px, rx, ui, sy, tc, id, tm]                                                 | 26340          |
| 2                                            | Validation or validity or reliability or psychometric* or equivalence or invariance).mp. [mp=ti, ab, tx, ct, ot, nm, hw, fx, kf, px, rx, ui, sy, tc, id, tm] | 799727         |
| 3                                            | 1 and 2                                                                                                                                                      | 796            |
| 4                                            | Remove duplicates from 3                                                                                                                                     | 775            |
| <b>Psychologists Burnout Inventory (PBI)</b> |                                                                                                                                                              |                |
| 1                                            | (Psychologists Burnout Inventory or PBI).mp.[mp=ti, ab, tx, ct, ot nm, hw, fx, kf, px, rx, ui, sy, tc, id, tm]                                               | 2347           |
| 2                                            | Validation or validity or reliability or psychometric* or equivalence or invariance).mp. [mp=ti, ab, tx, ct, ot, nm, hw, fx, kf, px, rx, ui, sy, tc, id, tm] | 799727         |
| 3                                            | 1 and 2                                                                                                                                                      | 306            |
| 4                                            | Remove duplicates from 3                                                                                                                                     | 265            |
| <b>Maslach Burnout Inventory (MBI)</b>       |                                                                                                                                                              |                |

|   |                                                                                                                                                                                                                                                                                        |        |
|---|----------------------------------------------------------------------------------------------------------------------------------------------------------------------------------------------------------------------------------------------------------------------------------------|--------|
| 1 | (MBI or burnout measure or MBS or BM or Maslach Burnout Inventory or MBI dimensions or subscale of the Maslach burnout inventory or Maslach burnout inventory or general Survey or MBI-GS or MBI-HSS or Maslach).mp.[mp=ti, ab, tx, ct, ot nm, hw, fx, kf, px, rx, ui, sy, tc, id, tm] | 37066  |
| 2 | Validation or validity or reliability or psychometric* or equivalence or invariance).mp. [mp=ti, ab, tx, ct, ot, nm, hw, fx, kf, px, rx, ui, sy, tc, id, tm]                                                                                                                           | 799727 |
| 3 | 1 and 2                                                                                                                                                                                                                                                                                | 2228   |
| 4 | Remove duplicates from 3                                                                                                                                                                                                                                                               | 2082   |

**Supplementary table S2.** Detailed results of agreement between the authors and reviewers

| <b>PROM</b>                     | <b>Quantitative data measured</b> | <b>Analysis / techniques</b> | <b>Indices and the reviewers' interpretation</b>                                                                                                                                                                                                                                                                                 | <b>Author, year</b> | <b>Results</b>                                                                                                                | <b>Results of the comparison between authors' and reviewers' interpretation</b> |
|---------------------------------|-----------------------------------|------------------------------|----------------------------------------------------------------------------------------------------------------------------------------------------------------------------------------------------------------------------------------------------------------------------------------------------------------------------------|---------------------|-------------------------------------------------------------------------------------------------------------------------------|---------------------------------------------------------------------------------|
| Maslach Burnout Inventory (MBI) | Reliability (Homogeneity)         | Alpha Cronbach, $\alpha$     | $\alpha > 0.9$ , excellent<br>$\alpha = 0.8-0.9$ & the number of itmes $\leq 10$ , good<br>$\alpha = 0.8-0.9$ & the number of itmes 11-30, just acceptable<br>$\alpha = 0.7-0.8$ & the number of itmes $\leq 10$ , acceptable<br>$\alpha = 0.6-0.7$ , questionable<br>$\alpha = 0.5-0.6$ , poor<br>$\alpha < 0.5$ , unacceptable | Boles, 2000         | For the sample of educators and for frequency EE : 0.89, PA : 0.76 and DP : 0.80                                              | Partial agreement                                                               |
|                                 |                                   |                              |                                                                                                                                                                                                                                                                                                                                  | Boles, 2000         | For the sample of business owners and for frequency EE : 0.90, PA : 0.78 and DP : 0.70                                        | Partial agreement                                                               |
|                                 |                                   |                              |                                                                                                                                                                                                                                                                                                                                  | Chao, 2011          | For frequency EE : 0.91, PA : 0.62 and DP : 0.76                                                                              | Total agreement                                                                 |
|                                 |                                   |                              |                                                                                                                                                                                                                                                                                                                                  | Gold, 1984          | For frequency: EE : 0.88, PA : 0.74, and DP : 0.72 and for intensity: EE : 0.87, DP : 0.79 and PA : 0.75                      | Total agreement                                                                 |
|                                 |                                   |                              |                                                                                                                                                                                                                                                                                                                                  | Iwanicki, 1981      | For frequency EE : 0.90, PA : 0.76 and DP : 0.76 and for intensity EE : 0.89, DP : 0.79 and PA : 0.75                         | Total agreement                                                                 |
|                                 |                                   |                              |                                                                                                                                                                                                                                                                                                                                  | Kalliath, 2000      | For a sample of nurses and not specified whether for frequency or intensity EE : 0.90, PA : NA and DP : 0.76                  | Disagreement                                                                    |
|                                 |                                   |                              |                                                                                                                                                                                                                                                                                                                                  | Kalliath, 2000      | For a sample of laboratory technicians and not specified whether for frequency or intensity: EE : 0.84, PA : XX and DP : 0.75 | Disagreement                                                                    |

|                                         |                                                                      |                                                                                                                                            |                 |                                                                                                                                                                                                                                                              |                 |
|-----------------------------------------|----------------------------------------------------------------------|--------------------------------------------------------------------------------------------------------------------------------------------|-----------------|--------------------------------------------------------------------------------------------------------------------------------------------------------------------------------------------------------------------------------------------------------------|-----------------|
| Construct Validity (Factorial Analyses) | Exploratory factorial analyses (EFA)<br>1) Extraction<br>2) Rotation | Values $\geq 0.90$ was considered to indicate acceptable model fit<br>Values $\geq 0.95$ is presently accepted as an indicator of good fit | Kalliath, 2000  | For a sample of managers and not specified whether for frequency or intensity: EE : 0.84, PA : XX and DP : 0.71                                                                                                                                              | Disagreement    |
|                                         |                                                                      |                                                                                                                                            | Kim, 2008       | For frequency: EE : 0.92, PA : 0.80 and DP : 0.77                                                                                                                                                                                                            | Total agreement |
|                                         |                                                                      |                                                                                                                                            | Lahoz, 1989     | For frequency EE : 0.90, PA : 0.79 and DP : 0.74 and for intensity: EE : 0.89, DP : 0.79 and PA : 0.75                                                                                                                                                       | Total agreement |
|                                         |                                                                      |                                                                                                                                            | Meier, 1984     | Not specified whether for frequency or intensity<br>EE : 0.92, PA : 0.80 and DP : 0.77                                                                                                                                                                       | Disagreement    |
|                                         |                                                                      |                                                                                                                                            | Poghosyan, 2009 | Cronbach alphas for all countries exceed the critical value of 0.70, except for the depersonalization dimension in Armenia.                                                                                                                                  | Total agreement |
|                                         |                                                                      |                                                                                                                                            | Yadama, 1995    | EE: 0.88, DP: 0.80, and PA:0.74                                                                                                                                                                                                                              | Total agreement |
|                                         |                                                                      |                                                                                                                                            | Brookings, 1985 | For frequency<br>1) Scree test (4)<br>Communality : 0.85<br>2) Quartimin method<br>% Variance (h2) : 0.85 (EE)<br>0.92 (PA)<br>0.66 (DP)                                                                                                                     | Total agreement |
|                                         |                                                                      |                                                                                                                                            | Gold, 1992      | For frequency<br>1) NA<br>2) Oblimin : NR                                                                                                                                                                                                                    | Total agreement |
|                                         |                                                                      |                                                                                                                                            | Iwanicki, 1981  | 1) Scree test (4)<br>2) Varimax Method<br>Frequency<br>Eigenvalues >1<br>% Variance : 55<br>Intensity<br>Eigenvalues >1<br>% Variance : 55<br>2) Oblique<br>Frequency<br>Eigenvalues >1<br>% Variance : 55<br>Intensity<br>Eigenvalues >1<br>% Variance : 55 | Total agreement |

|                                       |                                                                                                                                            |                 |                                                                                                                                                                                                                                                                                     |                                                                                                           |                   |
|---------------------------------------|--------------------------------------------------------------------------------------------------------------------------------------------|-----------------|-------------------------------------------------------------------------------------------------------------------------------------------------------------------------------------------------------------------------------------------------------------------------------------|-----------------------------------------------------------------------------------------------------------|-------------------|
|                                       |                                                                                                                                            | Lahoz, 1989     | 1) NA<br>2) Varimax Method<br>Frequency<br>Eigenvalues EE =7.02<br>Eigenvalues PA = 2.81<br>Eigenvalues DP = 1.4<br>% Variance : 51                                                                                                                                                 | Intensity<br>Eigenvalues EE = 6.56<br>Eigenvalues PA = 3.12<br>Eigenvalues DP = 1.46<br>% Variance : 50.6 | Disagreement      |
|                                       |                                                                                                                                            | Chao, 2011      | EFA investigated an alternative factor structure, a four-factor model dividing the DP dimension into two factors (DP1 –indifference and DP2–rejection) was suggested.                                                                                                               |                                                                                                           | Total agreement   |
|                                       |                                                                                                                                            | Holland, 1994   | For a sample of teachers, EFA was conducted for two hypothesized dimensions and three hypothesized dimensions model. A close degree of correspondence is noted between both orthogonal and oblique solutions and both within principal components and principal factors approaches. |                                                                                                           | Disagreement      |
|                                       |                                                                                                                                            | Poghosyan, 2009 | For a sample of social workers, they began with MBI that is widely used with 22 items and a three-factor structure. They also tested the validity of the revised MBI with 18 items. The new re-specified MBI had a much better fit than the original MBI.                           |                                                                                                           | Partial agreement |
| Confirmatory factorial analyses (CFA) | Values $\geq 0.90$ was considered to indicate acceptable model fit<br>Values $\geq 0.95$ is presently accepted as an indicator of good fit | Beckstead, 2002 | Frequency<br>Communality : 0.449<br>GFI : 0.78<br>AGFI : 0.73<br>CFI : 0.82<br>RMSEA : 0.09<br>SRMR : 0.11<br>$X^2 = 452.55$ , df 206, Null model                                                                                                                                   |                                                                                                           | Total agreement   |
|                                       |                                                                                                                                            | Gold, 1992      | GFI : 0.793<br>AGFI : 0.746<br>RMSR : 0.177<br>$X^2 = 396.49$ , df : 206, Modell Null                                                                                                                                                                                               |                                                                                                           | Disagreement      |

|                 |                                                                                                                                                                                                                                                                                                                                                                                                                    |                 |
|-----------------|--------------------------------------------------------------------------------------------------------------------------------------------------------------------------------------------------------------------------------------------------------------------------------------------------------------------------------------------------------------------------------------------------------------------|-----------------|
| Kim, 2011       | CFI : 0.86<br>RMSEA : 0.08<br>Standardized root-mean-square error of approximation<br>X2 = 892, df 206, Model One Factor                                                                                                                                                                                                                                                                                           | Disagreement    |
| Holland, 1994   | GFI : 0.777<br>GFI Model Orthogonal : 0.745<br>AGFI : 0.726<br>AGFI Model Orthogonal : 0.696<br>RMSR : 0.085<br>RMSR Model Orthogonal : 0.234<br>X2 = 455.97, df = 206, Null Model<br>X2 model orthogonal = 575.41, df = 212                                                                                                                                                                                       | Disagreement    |
| Chao, 2011      | GFI : 0.85<br>RMSEA : 0.079<br>AIC : 751.38<br>X2 = 657.38, df = 206, Null Model                                                                                                                                                                                                                                                                                                                                   | Total agreement |
| Gold, 1984      | Communality:<br>Range H2 Frequency EE : 39-62 (SM: 69)<br>Range H2 Frequency PA : 16-52<br>Range H2 Frequency DP : 22-66<br>Range H2 Intensity EE : 38-68<br>Range H2 Intensity PA : 22-50<br>Range H2 Intensity DP : 24-63<br>Varimax rotation<br>Frequency Intensity<br>Eigenvalues EE = 5.8 Eigenvalues EE = 5.41<br>Eigenvalues PA = 1.08 Eigenvalues PA = 1.23<br>Eigenvalues DP = 1.93 Eigenvalues DP = 2.55 | Disagreement    |
| Brookings, 1985 | Using the scree criterion, four components were retained and rotated to oblique simple structure by the quartimin method.                                                                                                                                                                                                                                                                                          | Total agreement |
| Boles, 2000     | They examined the dimensionality of burnout through confirmatory factor analysis (CFA) with LISREL VIII. Only the CFI changed from .88 in the baseline model to .87 in the factor loadings invariant model.                                                                                                                                                                                                        | Disagreement    |

|                                          |                                                   |                             |                 |                                                                                                                                                                                                                                                                                                                                                                                                                                                                                       |                   |
|------------------------------------------|---------------------------------------------------|-----------------------------|-----------------|---------------------------------------------------------------------------------------------------------------------------------------------------------------------------------------------------------------------------------------------------------------------------------------------------------------------------------------------------------------------------------------------------------------------------------------------------------------------------------------|-------------------|
| Convergent Validity (Construct Validity) | Multi Matrix<br><br>Percentage of Shared Variance | $r \geq 0.40$ is acceptable | Lahoz, 1989     | Factor analysis (principal factoring) with iteration and an orthogonal (varimax) rotation was used. The three factors accounted for 51.0% of the total variance in the frequency dimension with corresponding eigenvalues of 7.02, 2.81, and 1.40. For the intensity dimension, 50.6% of the total variance was accounted for by the three factors with eigenvalues of 6.56, 3.12, and 1.46.                                                                                          | Total agreement   |
|                                          |                                                   |                             | Poghosyan, 2009 | While the values of the Root Mean Square Error of Approximation (RMSEA) and Bartlett's Comparative Fit Index (CFI) approach the values that are usually considered acceptable (i.e., RMSEA < .06 and CFI > .90, respectively), the RMSEA shows an acceptable fit only in Russia and the CFI value is unacceptable in every country. Moreover, the chi-square statistic indicating the goodness-of-fit in each country suggests an unacceptable fit of model to data in every country. | Disagreement      |
|                                          |                                                   |                             | Yadama, 1995    | The null model has a GFI of 0.79 and an adjusted goodness-of-fit index (AGFI) of 0.75. All of these indicators represent a poor overall fit between the hypothesized three-factor structure with 22 indicators and the observed factor pattern in the data.                                                                                                                                                                                                                           | Partial agreement |
|                                          |                                                   |                             | Brookings, 1985 | Object of comparison :<br>Staff burnout Scale for health professional (SBS)<br>- one factor<br>r EE = 0.71<br>r PA = (-) 0.34<br>r DP = NR<br>Maslach and Jackson (1981) sample<br>r EE = 0.94<br>r PA = 0.94<br>r DP = 0.74                                                                                                                                                                                                                                                          | Total agreement   |

|               |                                                                                                                                                                                                                                                                                                                                                                                                                                                                                                                                                                                                                                                                                                                                                                                                                                                                                                                                                                                                                                                                                                                                                                                                                                     |                 |
|---------------|-------------------------------------------------------------------------------------------------------------------------------------------------------------------------------------------------------------------------------------------------------------------------------------------------------------------------------------------------------------------------------------------------------------------------------------------------------------------------------------------------------------------------------------------------------------------------------------------------------------------------------------------------------------------------------------------------------------------------------------------------------------------------------------------------------------------------------------------------------------------------------------------------------------------------------------------------------------------------------------------------------------------------------------------------------------------------------------------------------------------------------------------------------------------------------------------------------------------------------------|-----------------|
| Maslach, 1981 | <p>Object of comparison:</p> <p>Co-worker Assessment for emotionally drained by the job and EE: <math>r = 0.41</math>, <math>p &lt; 0.01</math></p> <p>Co-worker Assessment for emotionally drained by the job and DP: <math>r = 0.57</math>, <math>p &lt; 0.001</math></p> <p>Co-worker Assessment for Physical fatigue and EE (Frequency): <math>r = 0.42</math>, <math>p &lt; 0.01</math></p> <p>Co-worker Assessment for Physical fatigue and DP: <math>r = 0.50</math>, <math>p &lt; 0.01</math></p> <p>Co-worker ratings - ""Complaints about clients "" and DP: <math>r = 0.33</math>, <math>p &lt; 0.05</math></p> <p>Co-worker ratings of individual's satisfaction with the job and PA: <math>r = \text{NR}</math></p> <p>Co-worker Assessment "Breaks Frequency" (Intensity) (EE): <math>r = 0.29</math>, <math>p &lt; 0.04</math></p> <p>Co-worker Assessment "absenteeism" (DP): <math>r = 0.30</math>, <math>p &lt; 0.04</math></p> <p>Co-worker Assessment "JDS" (EE): <math>r = (-) 0.19</math>, <math>p &lt; 0.01</math></p> <p>Co-worker Assessment "JDS" (PA): <math>r = 0.32</math>, <math>p &lt; 0.001</math></p> <p>Co-worker Assessment "JDS" (DP): <math>r = (-) 0.36</math>, <math>p &lt; 0.001</math></p> | Disagreement    |
| Meier, 1984   | <p>Object of comparison:</p> <p>Meier Burnout Assessment (MBA), <math>r = 0.61</math></p> <p>Self Rating of Burnout, <math>r = 0.65</math></p> <p>Burnout True-False, <math>r = 0.63</math></p>                                                                                                                                                                                                                                                                                                                                                                                                                                                                                                                                                                                                                                                                                                                                                                                                                                                                                                                                                                                                                                     | Total agreement |

|                                            |                                           |                                                                                                                                                             |               |                                                                                                                                                                                                                                                                                                                                                                                                                                                                                                                                                                                                                                                                                |                   |
|--------------------------------------------|-------------------------------------------|-------------------------------------------------------------------------------------------------------------------------------------------------------------|---------------|--------------------------------------------------------------------------------------------------------------------------------------------------------------------------------------------------------------------------------------------------------------------------------------------------------------------------------------------------------------------------------------------------------------------------------------------------------------------------------------------------------------------------------------------------------------------------------------------------------------------------------------------------------------------------------|-------------------|
| Discriminant Validity (Construct Validity) | Multi Matrix                              | r between -1 to -0.5:<br>strong negative correlation                                                                                                        | Boles, 2000   | For educators' sample<br>Meier Burnout Assessment (MBA), $r = 0.61$<br>Self-rating of Burnout, $r = 0.65$<br>Burnout True-False, $r = 0.63$<br>Among factors in the three correlated first-order factor model, $r = [0.10-0.71]$<br>Parameter Estimation $< 1$ , CI : 95%<br>First order Three Factor Model and Two factor model (EE=DP), $X^2_{diff}(2) = 108.30$ , $p < .001$<br>Sample Business Owners<br>Among factors in the three correlated first-order factor model, $r = [0.07-0.71]$ , parameter estimation $< 1$ , CI : 95%<br>Object of comparison : PA - EE<br>First order Three Factor Model and Two factor model (EE=DP), $X^2_{diff}(2) = 49.82$ , $p < 0.001$ | Partial agreement |
|                                            | Canonical Correlation                     | r between -0.5 to 0:<br>weak negative correlation<br>r between 0 to 0.5:<br>weak positive correlation<br>r between 0.5 to 1:<br>strong positive correlation |               |                                                                                                                                                                                                                                                                                                                                                                                                                                                                                                                                                                                                                                                                                |                   |
|                                            | Heterotrait-monotrait Ratio Matrix (HTMT) | A HTMT $> 0.80$ means a lack of discriminant validity (some authors put the threshold at 0.90)                                                              |               |                                                                                                                                                                                                                                                                                                                                                                                                                                                                                                                                                                                                                                                                                |                   |
|                                            |                                           |                                                                                                                                                             | Maslach, 1981 | Object of comparison :<br>JDS - General Job dissatisfaction (PA) - Frequency only, $r = 0.17$ , $p < 0.06$ , % of variance: $< 6\%$ "<br>JDS - General Job dissatisfaction (DP) - Frequency only, $r = -0.22$ , $p < 0.02$ , % of variance : $< 6\%$ "<br>JDS - General Job dissatisfaction (EE), $r = -0.23$ , $p < 0.05$ , % of variance : $< 6\%$                                                                                                                                                                                                                                                                                                                           | Total agreement   |
|                                            |                                           |                                                                                                                                                             | Meier, 1984   | Number of comparison : 12<br>Number of results which met the criterion : 11<br>Criterion Excluded (r) : (MBA-CDD) 0.65<br>Object of comparison / Criterion : Validity coefficient<br>Number of comparison : 12<br>Number of results which met the criterion : 10<br>Criterion Excluded (r) :<br>MBA-MMPI-D (0.69)<br>MBA-BO Self rating (0.65)"<br>Object of comparison / Criterion : rank order of correlations within the mono-method and heterotrait-heteromethod triangles<br>Number of triangles in the matrix: 9<br>Number of identical ranking: 6                                                                                                                       | Total agreement   |



|                                    |                                                  |                               |                                                                                                                                                                                                                                                                                                                                                                         |                  |                                                                                                                                                                                                                                                                                                                                                                                                           |                 |
|------------------------------------|--------------------------------------------------|-------------------------------|-------------------------------------------------------------------------------------------------------------------------------------------------------------------------------------------------------------------------------------------------------------------------------------------------------------------------------------------------------------------------|------------------|-----------------------------------------------------------------------------------------------------------------------------------------------------------------------------------------------------------------------------------------------------------------------------------------------------------------------------------------------------------------------------------------------------------|-----------------|
|                                    | Reliability - Test-Retest (stability)            | Fidelity Coefficient          | 1) Values $>.7$ are satisfactory<br>A stable short term (2-3 weeks) dimension should have a fidelity coefficient from $.8$ to $.9$                                                                                                                                                                                                                                      | Maslach, 1981    | Interval 2-4 Weeks.<br>Values ranging from $0.53$ to $0.82$                                                                                                                                                                                                                                                                                                                                               | Total agreement |
|                                    |                                                  | Structural equation modelling | -1 to -0.5: strong negative correlation<br>-0.5 to 0: weak negative correlation<br>0 to 0.5: weak positive correlation<br>0.5 to 1: strong positive correlation                                                                                                                                                                                                         |                  |                                                                                                                                                                                                                                                                                                                                                                                                           |                 |
| Copenhagen Burnout Inventory (CBI) | Predictive Validity (Criterion Related Validity) |                               | 1) Correlation coefficient (r) $r \geq .7$ : good correlation, $r = 0$ : no correlation<br>2) Mixed effect regression: $(\beta)$ mean change in the response variable for one unit of change in the predictor variable while holding other predictors in the model constant. Its interpretation depends on the nature of the variables, e.g. continuous or categorical. | Kristensen, 2005 | Client-Related Burnout<br>Objects of comparison: Sickness days: lowest quartile (6.9), highest quartile (13.0)<br>Sickness spells: lowest quartile (1.5), highest quartile (2.4)<br>Sleep problems: lowest quartile: (25.1), highest quartile: (44.6)<br>Use of painkillers lowest quartile: 18% highest quartile: (38%)<br>Intention to quit the workplace lowest quartile (45%), highest quartile (65%) | Total agreement |

|                                                  |                                                                                                                                                                                                                                                                                                                                                                                                                     |                                                                                                                                                                                                                                                                                                                                                                                                                                                                                |                                                                                                                                                                                                                                   |                                                                                                                                                                                                                                                                                                                                                                                                                                                                      |                 |
|--------------------------------------------------|---------------------------------------------------------------------------------------------------------------------------------------------------------------------------------------------------------------------------------------------------------------------------------------------------------------------------------------------------------------------------------------------------------------------|--------------------------------------------------------------------------------------------------------------------------------------------------------------------------------------------------------------------------------------------------------------------------------------------------------------------------------------------------------------------------------------------------------------------------------------------------------------------------------|-----------------------------------------------------------------------------------------------------------------------------------------------------------------------------------------------------------------------------------|----------------------------------------------------------------------------------------------------------------------------------------------------------------------------------------------------------------------------------------------------------------------------------------------------------------------------------------------------------------------------------------------------------------------------------------------------------------------|-----------------|
| Concurrent Validity (Criterion Related Validity) | <p>1) Correlation coefficient (r) <math>r \geq .7</math> : good correlation, <math>r = 0</math> : no correlation</p> <p>2) Mixed effect regression: (<math>\beta</math>) mean change in the response variable for one unit of change in the predictor variable while holding other predictors in the model constant. Its interpretation depends on the nature of the variables, e.g. continuous or categorical.</p> | Kristensen, 2005                                                                                                                                                                                                                                                                                                                                                                                                                                                               | <p>Client-Related Burnout</p> <p>Object of comparison: Job Satisfaction: lowest quartile (68.4), highest quartile (55.1)</p> <p>Percentage who would choose the same job again: lowest quartile (81%), highest quartile (66%)</p> | Total agreement                                                                                                                                                                                                                                                                                                                                                                                                                                                      |                 |
| Reliability (Homogeneity)                        | Alpha Cronbach, $\alpha$                                                                                                                                                                                                                                                                                                                                                                                            | <p><math>\alpha &gt; 0.9</math>, excellent</p> <p><math>\alpha = 0.8-0.9</math> &amp; the number of items <math>\leq 10</math>, good</p> <p><math>\alpha = 0.8-0.9</math> &amp; the number of items 11-30, just acceptable</p> <p><math>\alpha = 0.7-0.8</math> &amp; the number of items <math>\leq 10</math>, acceptable</p> <p><math>\alpha = 0.6-0.7</math>, questionable</p> <p><math>\alpha = 0.5-0.6</math>, poor</p> <p><math>\alpha &lt; 0.5</math>, unacceptable</p> | Kristensen, 2005                                                                                                                                                                                                                  | <p>Personal Burnout : 0.87</p> <p>Work-Related Burnout : 0.87</p> <p>Client-Related Burnout : 0.85</p>                                                                                                                                                                                                                                                                                                                                                               | Total agreement |
| Convergent Validity (Construct Validity)         | Multi Matrix<br><br>Percentage of Shared Variance                                                                                                                                                                                                                                                                                                                                                                   | $r \geq 0.40$ is acceptable                                                                                                                                                                                                                                                                                                                                                                                                                                                    | Kristensen, 2005                                                                                                                                                                                                                  | <p>Analyses show substantial associations with job satisfaction at baseline and with sickness absence, sleep problems, use of medicine, and intention to quit three years later.</p> <p>The strong association between burnout and sleep problems is particularly noteworthy since fatigue/burnout and poor sleep have been shown to predict cardiovascular diseases and mortality (Prescott, et al., 2003; van Amelsvoort, Kant, Bu"ltmann, &amp; Swaen, 2003).</p> | Disagreement    |

|                                                     |                                                  |                                                                                                                                                                |                  |                                                                                                      |              |
|-----------------------------------------------------|--------------------------------------------------|----------------------------------------------------------------------------------------------------------------------------------------------------------------|------------------|------------------------------------------------------------------------------------------------------|--------------|
| Discriminant<br>Validity<br>(Construct<br>Validity) | Multi Matrix                                     | r between -1 to -0.5:<br>strong negative<br>correlation                                                                                                        | Kristensen, 2005 | The lowest correlation (divergent validity)<br>between general health and client-related<br>burnout. | Disagreement |
|                                                     | Canonical<br>Correlation                         | r between -0.5 to 0:<br>weak negative correlation<br>r between 0 to 0.5:<br>weak positive correlation<br>r between 0.5 to 1:<br>strong positive<br>correlation |                  |                                                                                                      |              |
|                                                     | Heterotrait-<br>monotrait Ratio<br>Matrix (HTMT) | A HTMT >0.80 means a<br>lack of discriminant<br>validity (some authors<br>put the threshold at 0.90)                                                           |                  |                                                                                                      |              |

|                                             |                                                          |                                                                  |                                                                                                                                                        |                 |                                                                                                                                                                                                                                                                                                                                                                                                                                                                                                                                                                                                                                                                                                                                                                                                                                                |                   |
|---------------------------------------------|----------------------------------------------------------|------------------------------------------------------------------|--------------------------------------------------------------------------------------------------------------------------------------------------------|-----------------|------------------------------------------------------------------------------------------------------------------------------------------------------------------------------------------------------------------------------------------------------------------------------------------------------------------------------------------------------------------------------------------------------------------------------------------------------------------------------------------------------------------------------------------------------------------------------------------------------------------------------------------------------------------------------------------------------------------------------------------------------------------------------------------------------------------------------------------------|-------------------|
| Oldenburg<br>Burnout<br>Inventory<br>(OLBI) | Construct/Content<br>Validity<br>(Factorial<br>analysis) | Confirmatory<br>Analysis :<br>GFI, RMSR,<br>NFI, CFI, IFI,<br>X2 | Values $\geq 0.90$ was<br>considered to indicate<br>acceptable model fit<br>Values $\geq 0.95$ is<br>presently accepted as an<br>indicator of good fit | Demerouti, 2001 | Sample : Human resources<br>GFI: 0.91, NFI : 0.84, CFI : 0.94, IFI: 0.94,<br>RMSR: 0.05, X2 (df): 106.17 (73)<br>Sample: Industry<br>GFI: 0.91, NFI : 0.88, CFI : 0.97, IFI : 0.97,<br>RMSR: 0.05, X2 (df): 194.39(73)<br>Sample: Transport<br>GFI: 0.90, NFI : 0.79, CFI : 0.96, IFI : 0.97,<br>RMSR: 0.04, X2 (df): 83.06(73)<br>Sample: Mixed<br>GFI: 0.90<br>Equal factor loadings : 0.89<br>Equal factor variances : 0.90<br>Equal error variances :0.87<br>NFI : 0.84<br>Equal factor loadings : 0.82<br>Equal factor variances : 0.83<br>Equal error variances : 0.78<br>CFI : 0.95<br>Equal factor loadings : 0.94<br>Equal factor variances : 0.94<br>Equal error variances : 0.9<br>IFI : 0.95<br>Equal factor loadings : 0.94<br>Equal factor variances : 0.94<br>Equal error variances : 0.9<br>RMSR: 0.04<br>X2 (df): 303.52(219) | Partial agreement |
| Psychologists<br>Burnout<br>Inventory (PBI) | Content validity<br>(factorial<br>analysis)              |                                                                  |                                                                                                                                                        | Ackerley, 1988  | 1). Scree test: indicated that all four factors should<br>be retained<br>2) Varimax rotation<br>Four eigenvalues exceeding 1 (2.69, 1.93, 1.70,<br>and 1.28), which accounted for<br>18%, 13%, 11%, and 9% of the variance,<br>respectively.                                                                                                                                                                                                                                                                                                                                                                                                                                                                                                                                                                                                   | Partial agreement |

|                      |                                                   |                                                                                        |                                                      |             |                                                                                                                                                                                                                                                                                                                                                                                                                                                                                                                                                                                                                                                                                                                                                                                                                                                                                                                                                                                                                                                                                                                                                                                                                                                                                                                                                                                                                                                                                                                                                                                                                                                                                                                                                                                    |                 |
|----------------------|---------------------------------------------------|----------------------------------------------------------------------------------------|------------------------------------------------------|-------------|------------------------------------------------------------------------------------------------------------------------------------------------------------------------------------------------------------------------------------------------------------------------------------------------------------------------------------------------------------------------------------------------------------------------------------------------------------------------------------------------------------------------------------------------------------------------------------------------------------------------------------------------------------------------------------------------------------------------------------------------------------------------------------------------------------------------------------------------------------------------------------------------------------------------------------------------------------------------------------------------------------------------------------------------------------------------------------------------------------------------------------------------------------------------------------------------------------------------------------------------------------------------------------------------------------------------------------------------------------------------------------------------------------------------------------------------------------------------------------------------------------------------------------------------------------------------------------------------------------------------------------------------------------------------------------------------------------------------------------------------------------------------------------|-----------------|
| Burnout measure (BM) | Criterion-related validity (concurrence validity) | r correlation coefficient / concordance btwn test results and value of other variables | r ≥ 0.7 : good correlation<br>r = 0 : no correlation | Pines, 1981 | <p>Variable of comparison: Satisfaction from Work<br/> Sample 1: -0.39, sample 2:- 0.53, sample 3:- 0.63, sample 4:- 0.38, sample 5:- 0.58, sample 6: -0.52, Sample 9: -0.58, sample 10 : -0.45, sample 11 : -0.37 (not significant), sample 12 : -0.45, sample 18 :- 0.53, sample 24 : -0.24, sample 25 : -0.3 - And below Israel sample, sample 26 : -0.53, sample 27 : -0.26, and sample 27 : -0.39<br/> Satisfaction from Life: Sample 1: -0.56, sample 2:- 0.58, sample 3 :- 0.62, sample 4 :- 0.38, sample 9 : -0.44, sample 10 : -0.43, sample 11 : -0.53, sample 12 : -0.55, sample 18 :- 0.7, sample 24 : -0.34, sample 25 : -0.46 - And below Israel sample, sample 26 : 0.47, sample 27 : -0.32, and sample 28 : -0.54<br/> Satisfaction from self: Sample 2: - 0.54, sample 3:- 0.62, sample 9: -0.45, sample 10: -0.43, sample 11: -0.34 (not significant), sample 12: - 0.59, sample 18:- 0.68, sample 24 : -0.40, sample 25 : -0.41 - And below Israel sample, and sample 28: -0.32<br/> Perception of physical health: Sample 1: 0.39, sample 4: -0.33, sample 10: -0.26, sample 24: -0.2, sample 25: -0.38 - And below Israel sample, sample 26: -0.46, sample 28: -0.28 and sample 29: -0.25<br/> Perception for sleep problems: Sample 4: 0.30, sample 5: 0.33, and sample 6: 0.32<br/> Conflict life and work, sample 1: 0.36, sample 10: 0.33, sample 24: 0.38, sample 29: 0.28 and sample 29: 0.24<br/> Hopelessness (questionnaire of Beck and co): Sample 3: 0.59, p&lt;.001"<br/> Tardiness (number of days in a year in which employees late for work): Sample 26: 0.30, p&lt;.001"<br/> Major life events (physical and mental health, economic situation, family condition, work and other situations): Sample 3 (other sample were not assessed):</p> | Total agreement |
|----------------------|---------------------------------------------------|----------------------------------------------------------------------------------------|------------------------------------------------------|-------------|------------------------------------------------------------------------------------------------------------------------------------------------------------------------------------------------------------------------------------------------------------------------------------------------------------------------------------------------------------------------------------------------------------------------------------------------------------------------------------------------------------------------------------------------------------------------------------------------------------------------------------------------------------------------------------------------------------------------------------------------------------------------------------------------------------------------------------------------------------------------------------------------------------------------------------------------------------------------------------------------------------------------------------------------------------------------------------------------------------------------------------------------------------------------------------------------------------------------------------------------------------------------------------------------------------------------------------------------------------------------------------------------------------------------------------------------------------------------------------------------------------------------------------------------------------------------------------------------------------------------------------------------------------------------------------------------------------------------------------------------------------------------------------|-----------------|

Positive life events    Negative life events  
 -0.22, p<.001            0.30, p<.001  
 Tendency to leave the job : Sample 5: 0.58, p<  
 0.5, sample 6 : 0.40, p< 0.5, sample 10 : 0.33, p<  
 0.5 and sample 24 : 0.27, p< 0.5

*EE: emotional exhaustion, PA: personal accomplishment, DP: depersonalization, NA: not assessed, EFA: exploratory factor analysis, CFA: confirmatory factor analysis, GFI: goodness of fit index, AGFI: adjusted goodness of fit index, CFI: comparative fit index, RMSEA: root mean square error of approximation, RMR: root-mean-square residual, JD-R: job demands-resources model, X2: minimum fit function test, df: degrees of freedom, CI: confidence interval, H2: total amount of variance a variable shares with all factors, and HTMT: Heterotrait-monotrait Ratio Matrix*

**Supplementary table S3. Detailed results for quality assessment of five burnout PROMs according to COSMIN**

| <b>PROM</b>                        | <b>Psychometric property</b> | <b>Overall rating</b> | <b>Reason for rating</b>                                                                                                            | <b>Quality of evidence</b> | <b>Reason for downgrading the evidence</b>                                                                                                                      |
|------------------------------------|------------------------------|-----------------------|-------------------------------------------------------------------------------------------------------------------------------------|----------------------------|-----------------------------------------------------------------------------------------------------------------------------------------------------------------|
| Copenhagen Burnout Inventory (CBI) | Content validity             | +                     | The assessment of this psychometric property of the PROM design was very good but there was only one content validity study.        | Moderate                   | We downgraded the evidence from high to moderate because of potential risk of bias, as the conclusion is drawn from one adequate content validity study.        |
|                                    | <i>Relevance</i>             | +                     | <i>The assessment of this psychometric property of the PROM design was very good but there was only one content validity study.</i> | <i>Moderate</i>            | <i>We downgraded the evidence from high to moderate because of potential risk of bias, as the conclusion is drawn from one adequate content validity study.</i> |
|                                    | <i>Comprehensiveness</i>     | NA                    | <i>The authors did not assess the comprehensiveness of their PROM.</i>                                                              | <i>Not assessed</i>        | <i>We could not assess the risk of bias therefore we did not assess the quality of evidence.</i>                                                                |
|                                    | <i>Comprehensibility</i>     | +                     | <i>The assessment of this psychometric property of the PROM design was very good but there was only one content validity study.</i> | <i>Moderate</i>            | <i>We downgraded the evidence from high to moderate because of potential risk of bias, as the conclusion is drawn from one adequate content validity study.</i> |

|                                    |                                                |    |                                                                                                                              |              |                                                                                                                                                  |
|------------------------------------|------------------------------------------------|----|------------------------------------------------------------------------------------------------------------------------------|--------------|--------------------------------------------------------------------------------------------------------------------------------------------------|
|                                    | Structural validity                            | -  | No factor analysis was performed because the author thought that this validation for CBI dimensions would not be meaningful. | Very low     | There is a high risk of bias and the quality of evidence is very low because of inadequate analysis.                                             |
|                                    | Internal consistency                           | +  | They calculated the Cronbach's alpha and the indices were good.                                                              | Moderate     | We downgraded the evidence from high to moderate because of potential risk of bias, as the conclusion is drawn from one adequate validity study. |
|                                    | Cross-cultural validity\measurement invariance | NA | We did not assess the measurement invariance in this systematic review and it was beyond our scope.                          | Not assessed | We did not assess the risk of bias therefore we did not assess the quality of evidence.                                                          |
|                                    | Reliability                                    | -  | The authors did not perform any analysis for reliability; it was a follow-up study with three years interval.                | Very low     | There is a high risk of bias and the quality of evidence is very low because of inadequate analysis.                                             |
|                                    | Measurement error                              | -  | The authors did not perform any analysis for measurement error.                                                              | Very low     | There is a high risk of bias and the quality of evidence is very low because of inadequate analysis.                                             |
|                                    | Criterion validity                             | -  | The authors did not perform any analysis for criterion validity.                                                             | Very low     | There is a high risk of bias and the quality of evidence is very low because of inadequate analysis.                                             |
|                                    | Construct validity                             | +  | The author measured the convergent and discriminant validity of their PROM, and the statistical analysis was adequate.       | Moderate     | We downgraded the evidence from high to moderate because of potential risk of bias, as the conclusion is drawn from one adequate validity study. |
|                                    | Responsiveness                                 | -  | The authors did not perform any analysis for responsiveness.                                                                 | Very low     | There is a high risk of bias and the quality of evidence is very low because of inadequate analysis.                                             |
| Oldenburg Burnout Inventory (OLBI) | Content validity                               | +  | The assessment of this psychometric property of the PROM design was very good but there was only one content validity study. | Moderate/low | We downgraded the evidence to moderate-low due to indirectness of the assessment, based on comparisons between extremely different groups.       |

|                                                |    |                                                                                                                                     |                     |                                                                                                                                                   |
|------------------------------------------------|----|-------------------------------------------------------------------------------------------------------------------------------------|---------------------|---------------------------------------------------------------------------------------------------------------------------------------------------|
| <i>Relevance</i>                               | +  | <i>The assessment of this psychometric property of the PROM design was very good but there was only one content validity study.</i> | <i>Moderate/low</i> | <i>We downgraded the evidence to moderate-low due to indirectness of the assessment, based on comparisons between extremely different groups.</i> |
| <i>Comprehensiveness</i>                       | NA | <i>The authors did not assess the comprehensiveness of their PROM.</i>                                                              | <i>Not assessed</i> | <i>We could not assess the risk of bias therefore we did not assess the quality of evidence.</i>                                                  |
| <i>Comprehensibility</i>                       | +  | <i>The assessment of this psychometric property of the PROM design was very good but there was only one content validity study.</i> | <i>Moderate/low</i> | <i>We downgraded the evidence to moderate-low due to indirectness of the assessment, based on comparisons between extremely different groups.</i> |
| Structural validity                            | +  | The authors performed confirmatory factor analysis and the sample size was adequate.                                                | Moderate/low        | We downgraded the evidence to moderate-low due to indirectness of the assessment, based on comparisons between extremely different groups.        |
| Internal consistency                           | +  | They calculated the Cronbach's alpha and the indices were good.                                                                     | Moderate            | We downgraded the evidence to moderate-low due to indirectness of the assessment, based on comparisons between extremely different groups.        |
| Cross-cultural validity\measurement invariance | NA | We did not assess the measurement invariance in this systematic review and it was beyond our scope.                                 | Not assessed        | We did not assess the risk of bias therefore we did not assess the quality of evidence.                                                           |
| Reliability                                    | -  | The authors did not perform adequate analysis for reliability; only interrater reliabilities were estimated.                        | Very Low            | There is a high risk of bias and the quality of evidence is very low because of inadequate analysis.                                              |
| Measurement error                              | -  | The authors did not perform any analysis for measurement error.                                                                     | Very low            | There is a high risk of bias and the quality of evidence is very low because of inadequate analysis.                                              |
| Criterion validity                             | -  | The authors did not perform any analysis for criterion validity.                                                                    | Very low            | There is a high risk of bias and the quality of evidence is very low because of inadequate analysis.                                              |
| Construct validity                             | +  | The interrater reliabilities were estimated via intra-class correlation coefficients, and the statistical analysis was adequate.    | Moderate            | We downgraded the evidence to moderate-low due to indirectness of the assessment, based on comparisons between extremely different groups.        |



|                                          |                                                |                                                 |                                                                                                                                 |                                                                                                      |                                                                                                                              |
|------------------------------------------|------------------------------------------------|-------------------------------------------------|---------------------------------------------------------------------------------------------------------------------------------|------------------------------------------------------------------------------------------------------|------------------------------------------------------------------------------------------------------------------------------|
| Maslach<br>Burnout<br>Inventory<br>(MBI) | Responsiveness                                 | -                                               | The authors did not perform any analysis for responsiveness.                                                                    | Very low                                                                                             | There is a high risk of bias and the quality of evidence is very low because of inadequate analysis.                         |
|                                          | Content validity                               | ±                                               | The quality of this psychometric assessment was doubtful for the PROM design and content validity studies.                      | Very low                                                                                             | We downgraded the evidence to very low due to inconsistencies in the reported results among content validity studies.        |
|                                          | <i>Relevance</i>                               | -                                               | <i>The quality of this psychometric assessment was inadequate because the authors did not assess the relevance of the PROM.</i> | <i>Very low</i>                                                                                      | <i>We downgraded the evidence to very low due to high risk of bias.</i>                                                      |
|                                          | <i>Comprehensiveness</i>                       | ±                                               | <i>The quality of this psychometric assessment was doubtful for the PROM design and content validity studies.</i>               | <i>Very low</i>                                                                                      | <i>We downgraded the evidence to very low due to inconsistencies in the reported results among content validity studies.</i> |
|                                          | <i>Comprehensibility</i>                       | ±                                               | <i>The quality of this psychometric assessment was doubtful for the PROM design and content validity studies.</i>               | <i>Very low</i>                                                                                      | <i>We downgraded the evidence to very low due to inconsistencies in the reported results among content validity studies.</i> |
|                                          | Structural validity                            | +                                               | Factor analysis was conducted in many validation studies and the sample size was adequate.                                      | Moderate                                                                                             | We downgraded the evidence from high to moderate because of potential risk of bias.                                          |
|                                          | Internal consistency                           | +                                               | Cronbach's alpha was calculated in many validation studies and the indices were good.                                           | High                                                                                                 | The evidence was high and there is a low potential risk of bias.                                                             |
|                                          | Cross-cultural validity\measurement invariance | NA                                              | We did not assess the measurement invariance in this systematic review and it was beyond our scope.                             | Not assessed                                                                                         | We did not assess the risk of bias therefore we did not assess the quality of evidence.                                      |
|                                          | Reliability                                    | -                                               | Reliability was not tested for this PROM.                                                                                       | Very low                                                                                             | There is a high risk of bias and the quality of evidence is very low because of inadequate analysis.                         |
| Measurement error                        | -                                              | Measurement error was not tested for this PROM. | Very low                                                                                                                        | There is a high risk of bias and the quality of evidence is very low because of inadequate analysis. |                                                                                                                              |

|                      |                          |                                                                                       |                                                                                                                                         |                                                                                                                                                  |                                                                                                             |
|----------------------|--------------------------|---------------------------------------------------------------------------------------|-----------------------------------------------------------------------------------------------------------------------------------------|--------------------------------------------------------------------------------------------------------------------------------------------------|-------------------------------------------------------------------------------------------------------------|
| Burnout measure (BM) | Criterion validity       | -                                                                                     | Criterion validity was not tested for this PROM.                                                                                        | Very low                                                                                                                                         | There is a high risk of bias and the quality of evidence is very low because of inadequate analysis.        |
|                      | Construct validity       | -                                                                                     | Inadequate analysis was conducted for construct validity.                                                                               | Very low                                                                                                                                         | There is a high risk of bias and the quality of evidence is very low because of inadequate analysis.        |
|                      | Responsiveness           | -                                                                                     | Responsiveness was not tested for this PROM.                                                                                            | Very low                                                                                                                                         | There is a high risk of bias and the quality of evidence is very low because of inadequate analysis.        |
|                      | Content validity         | -                                                                                     | The quality of this psychometric assessment was inadequate for the PROM design and content validity studies.                            | Very low                                                                                                                                         | There is a high risk of bias and the quality of evidence is very low because of inadequate analysis.        |
|                      | <i>Relevance</i>         | -                                                                                     | <i>The quality of this psychometric assessment was inadequate because the authors did not assess the relevance of the PROM.</i>         | <i>Very low</i>                                                                                                                                  | <i>There is a high risk of bias and the quality of evidence is very low because of inadequate analysis.</i> |
|                      | <i>Comprehensiveness</i> | -                                                                                     | <i>The quality of this psychometric assessment was inadequate because the authors did not assess the comprehensiveness of the PROM.</i> | <i>Very low</i>                                                                                                                                  | <i>There is a high risk of bias and the quality of evidence is very low because of inadequate analysis.</i> |
|                      | <i>Comprehensibility</i> | -                                                                                     | <i>The quality of this psychometric assessment was inadequate for the PROM design and content validity study</i>                        | <i>Very low</i>                                                                                                                                  | <i>There is a high risk of bias and the quality of evidence is very low because of inadequate analysis.</i> |
|                      | Structural validity      | -                                                                                     | No factor analysis was performed and the PROM was unidimensional.                                                                       | Very low                                                                                                                                         | There is a high risk of bias and the quality of evidence is very low because of inadequate analysis.        |
| Internal consistency | +                        | Cronbach's alpha was calculated in many validation studies and the indices were good. | Moderate                                                                                                                                | We downgraded the evidence from high to moderate because of potential risk of bias, as the conclusion is drawn from one adequate validity study. |                                                                                                             |

|                                       |                                                |    |                                                                                                                                         |                 |                                                                                                                                                  |
|---------------------------------------|------------------------------------------------|----|-----------------------------------------------------------------------------------------------------------------------------------------|-----------------|--------------------------------------------------------------------------------------------------------------------------------------------------|
|                                       | Cross-cultural validity\measurement invariance | NA | We did not assess the measurement invariance in this systematic review and it was beyond our scope.                                     | Not assessed    | We did not assess the risk of bias therefore we did not assess the quality of evidence.                                                          |
|                                       | Reliability                                    | +  | Test-retest reliability of the PROM was performed and the statistical analysis was adequate.                                            | Moderate        | We downgraded the evidence from high to moderate because of potential risk of bias, as the conclusion is drawn from one adequate validity study. |
|                                       | Measurement error                              | -  | Measurement error was not tested for this PROM.                                                                                         | Very low        | There is a high risk of bias and the quality of evidence is very low because of inadequate analysis.                                             |
|                                       | Criterion validity                             | -  | Criterion validity was not tested for this PROM.                                                                                        | Very low        | There is a high risk of bias and the quality of evidence is very low because of inadequate analysis.                                             |
|                                       | Construct validity                             | -  | Inadequate analysis was conducted for construct validity.                                                                               | Very low        | There is a high risk of bias and the quality of evidence is very low because of inadequate analysis.                                             |
|                                       | Responsiveness                                 | -  | Responsiveness was not tested for this PROM.                                                                                            | Very low        | There is a high risk of bias and the quality of evidence is very low because of inadequate analysis.                                             |
| Psychologists Burnout Inventory (PBI) | Content validity                               | -  | The quality of this psychometric assessment was inadequate for the PROM design and content validity studies.                            | Very low        | There is a high risk of bias and the quality of evidence is very low because of inadequate analysis.                                             |
|                                       | <i>Relevance</i>                               | -  | <i>The quality of this psychometric assessment was inadequate because the authors did not assess the relevance of the PROM.</i>         | <i>Very low</i> | <i>There is a high risk of bias and the quality of evidence is very low because of inadequate analysis.</i>                                      |
|                                       | <i>Comprehensiveness</i>                       | -  | <i>The quality of this psychometric assessment was inadequate because the authors did not assess the comprehensiveness of the PROM.</i> | <i>Very low</i> | <i>There is a high risk of bias and the quality of evidence is very low because of inadequate analysis.</i>                                      |
|                                       | <i>Comprehensibility</i>                       | -  | <i>The quality of this psychometric assessment was inadequate for the</i>                                                               | <i>Very low</i> | <i>There is a high risk of bias and the quality of evidence is very low because of inadequate analysis.</i>                                      |

*PROM design and content validity study.*

|                                                |   |                                                                                                     |              |                                                                                                                                                  |
|------------------------------------------------|---|-----------------------------------------------------------------------------------------------------|--------------|--------------------------------------------------------------------------------------------------------------------------------------------------|
| Structural validity                            |   | Principal-components factor analysis with varimax rotation were conducted.                          | Moderate     | We downgraded the evidence from high to moderate because of potential risk of bias, as the conclusion is drawn from one adequate validity study. |
| Internal consistency                           |   | Internal consistency was not tested for this PROM.                                                  | Very low     | There is a high risk of bias and the quality of evidence is very low because of inadequate analysis.                                             |
| Cross-cultural validity\measurement invariance | ? | We did not assess the measurement invariance in this systematic review and it was beyond our scope. | Not assessed | We did not assess the risk of bias therefor we did not assess the quality of evidence.                                                           |
| Reliability                                    | - | Reliability was not tested for this PROM.                                                           | Very low     | There is a high risk of bias and the quality of evidence is very low because of inadequate analysis.                                             |
| Measurement error                              | - | Measurement error was not tested for this PROM.                                                     | Very low     | There is a high risk of bias and the quality of evidence is very low because of inadequate analysis.                                             |
| Criterion validity                             | - | Criterion validity was not tested for this PROM.                                                    | Very low     | There is a high risk of bias and the quality of evidence is very low because of inadequate analysis.                                             |
| Construct validity                             | - | Inadequate analysis was conducted for construct validity.                                           | Very low     | There is a high risk of bias and the quality of evidence is very low because of inadequate analysis.                                             |
| Responsiveness                                 | - | Responsiveness was not tested for this PROM.                                                        | Very low     | There is a high risk of bias and the quality of evidence is very low because of inadequate analysis.                                             |

---

*Note: ±: The psychometric property assessment was inconsistent, +: The psychometric property assessment was sufficient, -: The psychometric property assessment was insufficient, and NA: The psychometric property was not assessed*
